# Supplementary material for: An after hours gp clinic in regional Australia: appropriateness of presentations and impact on local emergency department presentations
Source: BMC Fam Pract. 2017 Sep 11;18:86. doi: 10.1186/s12875-017-0657-6 (PMC5594615; doi:10.1186/s12875-017-0657-6)
Supplement: Supplementary file 2 — Client Follow-up Survey (PDF 78 kb) [file 12875_2017_657_MOESM2_ESM.pdf]

## Patient - Post Clinic follow-up questionnaire

As a way to ensure that the After Hours Service continues to meet the needs of the community, we are looking to capture the views of patients who have recently attended the After Hours GP Clinic.

Without telling me any personal information about your visit to the GP Clinic, could you please answer the following four (4) questions?

### Question 1.

a) Would you say In general that your health is?

(please circle only one)

- i) Excellent      ii) Very good      iii) Good      iv) Fair      v) Poor

### Question 2.

a) On a scale from 1 to 10, with 10 being very satisfied and 1 being very dissatisfied, how would you rate your satisfaction with the outcome of your visit to the GP After Hours Clinic?

(please circle)

1    2    3    4    5    6    7    8    9    10

### Question 3.

a) Was the reason you attended the GP Clinic resolved at the time of visit?

- a) YES      b) NO

b) if no, within 1 week of attending the clinic for the initial issue, did you:

- i) see another GP    ii) go to the ED    iii) see someone else (e.g. pharmacy) -----  
vi) didn't see anyone else

### Question 4.

a) Would you use this service again? b) Would you recommend this service to others

- a) use self    YES      NO      b) recommend    Yes      No

Is there anything that you would like to add or make comment on?

-----  
-----
